RESEARCH ARTICLE

# Migrants, healthy worker effect, and mortality trends in the Gulf Cooperation Council countries

Karima Chaabna\*, Sohaila Cheema, Ravinder Mamtani

Institute for Population Health, Weill Cornell Medicine-Qatar, Doha, Qatar

\* [kac2047@qatar-med.cornell.edu](mailto:kac2047@qatar-med.cornell.edu)

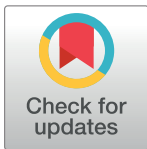

## Abstract

The Gulf Cooperation Council (GCC) countries namely, Bahrain, Kuwait, Oman, Qatar, United Arab Emirates (UAE), and Saudi Arabia, have experienced unique demographic changes. The major population growth contributor in these countries is young migrants, which has led to a shift in the population age pyramid. Migrants constitute the vast proportion of GCC countries' population reaching >80% in Qatar and UAE. Using Global Burden of Disease Study 2015 (GBD 2015) and United Nations data, for the GCC countries, we assessed the association between age-standardized mortality and population size trends with linear and polynomial regressions. In 1990–2015, all-cause age-standardized mortality was inversely proportional to national population size ( $p$ -values: 0.0001–0.0457). In Bahrain, Qatar, Oman, and Saudi Arabia, the highest annual decrease in mortality was observed when the annual population growth was the highest. In Qatar, all-cause age-specific mortality was inversely proportional to age-specific population size. This association was statistically significant among the 5–14 and 15–49 age groups, which have the largest population size. Cause-specific age-standardized mortality was also inversely proportional to population size. This association was statistically significant for half of the GBD 2015-defined causes of death such as “cirrhosis and other chronic liver diseases” and “HIV/AIDS and tuberculosis”. Remarkably, incoming migrants to Qatar have to be negative for HIV, hepatitis B and C, and tuberculosis. These results show that decline in mortality can be partly attributed to the increase in GCC countries' population suggesting a healthy migrant effect that influences mortality rates. Consequently, benefits of health interventions and healthcare improvement are likely to be exaggerated in such countries hosting a substantial proportion of migrants compared with countries where migration is low. Researchers and policymakers should be cautious to not exclusively attribute decline in mortality within the GCC countries as a result of the positive effects of health interventions or healthcare improvement.

## OPEN ACCESS

**Citation:** Chaabna K, Cheema S, Mamtani R (2017) Migrants, healthy worker effect, and mortality trends in the Gulf Cooperation Council countries. PLoS ONE 12(6): e0179711. <https://doi.org/10.1371/journal.pone.0179711>

**Editor:** Massimo Ciccozzi, National Institute of Health, ITALY

**Received:** April 19, 2017

**Accepted:** June 3, 2017

**Published:** June 20, 2017

**Copyright:** © 2017 Chaabna et al. This is an open access article distributed under the terms of the [Creative Commons Attribution License](https://creativecommons.org/licenses/by/4.0/), which permits unrestricted use, distribution, and reproduction in any medium, provided the original author and source are credited.

**Data Availability Statement:** GDB data set is available at: <http://vizhub.healthdata.org/gbd-compare/>. UN data set is available at: <https://esa.un.org/unpd/wpp/Download/Standard/Population/>.

**Funding:** The authors received no specific funding for this work.

**Competing interests:** The authors have declared that no competing interests exist.

**Abbreviations:** GBD, Global Burden of Disease, Injuries, and Risk Factors Study; GBD 2015, Global Burden of Disease Study 2015; GCC, Gulf

Cooperation Council; UAE, United Arab Emirates; S, Supplementary information.

## Introduction

While basic population pyramid shapes are usually determined by birth and death rates, within the Gulf Cooperation Council (GCC) countries namely, Bahrain, Kuwait, Oman, Qatar, United Arab Emirates (UAE), and Saudi Arabia, net migration is the main factor affecting population size and age structure [1, 2]. These countries are unique because they experienced rapid population growth due to a massive migration of temporary labor [1, 2]. Hence, these countries have observed a rapid increase in population within a short period of time consisting predominantly of young and/or healthy people [3]. Between 1990 and 2015, the highest annual population growth rates were observed in the over 15 age groups (S1 and S2 Figs) [3]. The effect of migration on the population structure was that the largest segment of the population consisted of 15–49 age group ( $\geq 60\%$  of the total population) among both males and females in the GCC countries [3]. Additionally, a substantial proportion of the GCC's population consisted of migrants: 32%, 44%, 51% and 68% in Saudi Arabia (2013) [4], Oman (2015) [5], Bahrain (2013) [6] and in Kuwait (2012) respectively [7], and over 80% in Qatar and the UAE [8, 9]. These migrants were predominantly males causing a bulge on one side of the population pyramid [3].

GCC countries are also unique because they include five of the ten countries with the highest diabetes prevalence worldwide [10]. Additionally, in these countries, a large proportion of the population is obese. Obesity prevalence was estimated at 41% in Qatar [11], 40% in Kuwait [12], 36% in Bahrain [13], 33% in UAE [14], 30% in Oman [15], and 28% in Saudi Arabia [16]. Of note, obesity prevalence in these countries was similar or higher than in the United States, where it is estimated to be 36% [17]; and much higher than global estimate at 13% [18]. Overall, mortality has decreased in the GCC countries, particularly among children (S3 Fig) [19, 20]. This decrease in mortality is commonly attributed to socioeconomic development and healthcare improvements [21].

In the GCC countries, all-cause and cause-specific mortality age-standardized rates were estimated by the Global Burden of Disease, Injuries, and Risk Factors Study (GBD) in the framework of a collaborative effort quantifying the burden of disease worldwide [22]. We hypothesized that the massive migration of young and/or healthy people within a short span of time in the GCC countries, was one of the major causes of the generalized decline in age-standardized mortality rates. Using Global Burden of Disease Study 2015 (GBD 2015) data [19, 20], we assessed all-cause and cause-specific mortality trends according to national population size trends [3].

## Materials and methods

We utilized publicly available data between 1990 and 2015 for the GCC countries namely, Bahrain, Kuwait, Oman, Qatar, Saudi Arabia, United Arab Emirates. Population data were retrieved from the World Population Prospect 2015 Revision by United Nations (UN) Population Division (<https://esa.un.org/unpd/wpp/Download/Standard/Population/>) [3]; and mortality data were retrieved from GBD 2015 (<http://vizhub.healthdata.org/gbd-compare/>) [19, 20]. We used UN data since GBD 2015 [19, 20] used this population data source [3] to estimate their mortality rates.

Causes of death included in our analyses were all causes and GBD 2015-defined death causes with the codes: A1-A7, B1-B10, and C1-C3. The cause of death "Forces of nature, war, and legal intervention" (GBD 2015 code C4) was not included in our analysis, as GCC countries have not been subjected to forces of nature, war, and legal intervention.

We computed annual population growth and annual percent change in all-cause age-standardized and age-specific rates. Using simple linear and polynomial regressions, we assessed

the association between all-cause age-standardized death rates and population sizes for each of the GCC countries. In Qatar, we also assessed the association between all-cause age-specific death rates and age-specific population sizes; and the association between cause-specific age-standardized death rates and population sizes. We conducted analysis of variance (ANOVA) to identify, which order of the polynomial regression model should be selected (significance threshold at 0.05). We assessed significance of the association using the F-test. Association statistical significance threshold at 0.05 was corrected using Bonferroni method to address multiple testing problem. As we conducted 32 tests, significance threshold was at 0.0016. We produced diagnostic plots of fitted values versus residuals to assess randomness and unpredictability of the residuals. We assessed the goodness-of-fit of the models using multiple R-squared statistics. We used R-3.3.1 software [23] for our analyses.

## Results and discussion

Changes in the national population size seem to affect age-standardized rates. In the GCC countries between 1990 and 2015, all-cause age-standardized mortality rates were inversely proportional to national population size ( $p$ -values between 0.0001 and 0.0457) (Fig 1 and S4 Fig) [3, 19, 20]. After applying Bonferroni correction on the  $p$ -value, the association between all-cause age-standardized mortality and population size was statistically significant for Bahrain ( $p$ -value = 0.0001,  $R^2 = 0.99$ ), Qatar ( $p$ -value = 0.0004,  $R^2 = 0.97$ ), and Saudi Arabia ( $p$ -value = 0.0004,  $R^2 = 0.99$ ). This association is interesting, as the age-standardization method should remove the effect of differences in population age structures observed over time. Furthermore, this association between age-standardized mortality and population size suggests a strong healthy population effect attributed to migrants which represent a substantial proportion of the GCC countries' population (up to >80% [8, 9]).

Migrant mortality and healthy migrant effect have been described in other regions and explained by migrant self-selection and health screening by host country, among others [24–27]. For instance in Australia, the increase in Australian life expectancy between 1981 and 2003 was attributed partly to healthy migrant effect [24]. Within the GCC countries, health screening is mandatory for migrants upon arrival. Migrants are particularly screened for infectious diseases such as HIV, hepatitis B and C, syphilis, and tuberculosis [28–33]. In the GCC countries, healthy migrant effect appears to affect country-level mortality rates. As the GCC countries' population increases due to migration, the mortality rates further tend to decrease. Benefits of health interventions and healthcare improvements are likely to be exaggerated in such countries that host a substantial proportion of migrants compared with countries where migration is low such as Japan, Algeria, and Morocco, among others [24]. It is likely that our results are applicable to other countries with more than 30% migrant workers in their populations e.g. Andorra, Brunei, Hong Kong, Israel, Liechtenstein, Luxembourg, Singapore, and Switzerland (S5 Fig) [34].

In Qatar, until 2000, annual population growth was below 4% (Table 1) [3]. Thereafter, population growth increased rapidly reaching a peak at 22.2% between 2005 and 2010. After 2010, the population growth decreased reaching 5.3% for the period 2010–2015. Remarkably, the annual decrease in all-cause age-standardized mortality was the highest at -4.7% between 2005 and 2010. Likewise, in Bahrain, population growth was the highest in 2005–2010 at 9.1%; and during the same period, the decrease in all-cause age-standardized mortality was the highest (-4.3%). In Oman and Saudi Arabia, the highest annual decrease in mortality was also observed when annual population growth rates were the highest. However, in Kuwait and United Arab Emirates, this pattern of high decrease in mortality during high population growth was not clear.

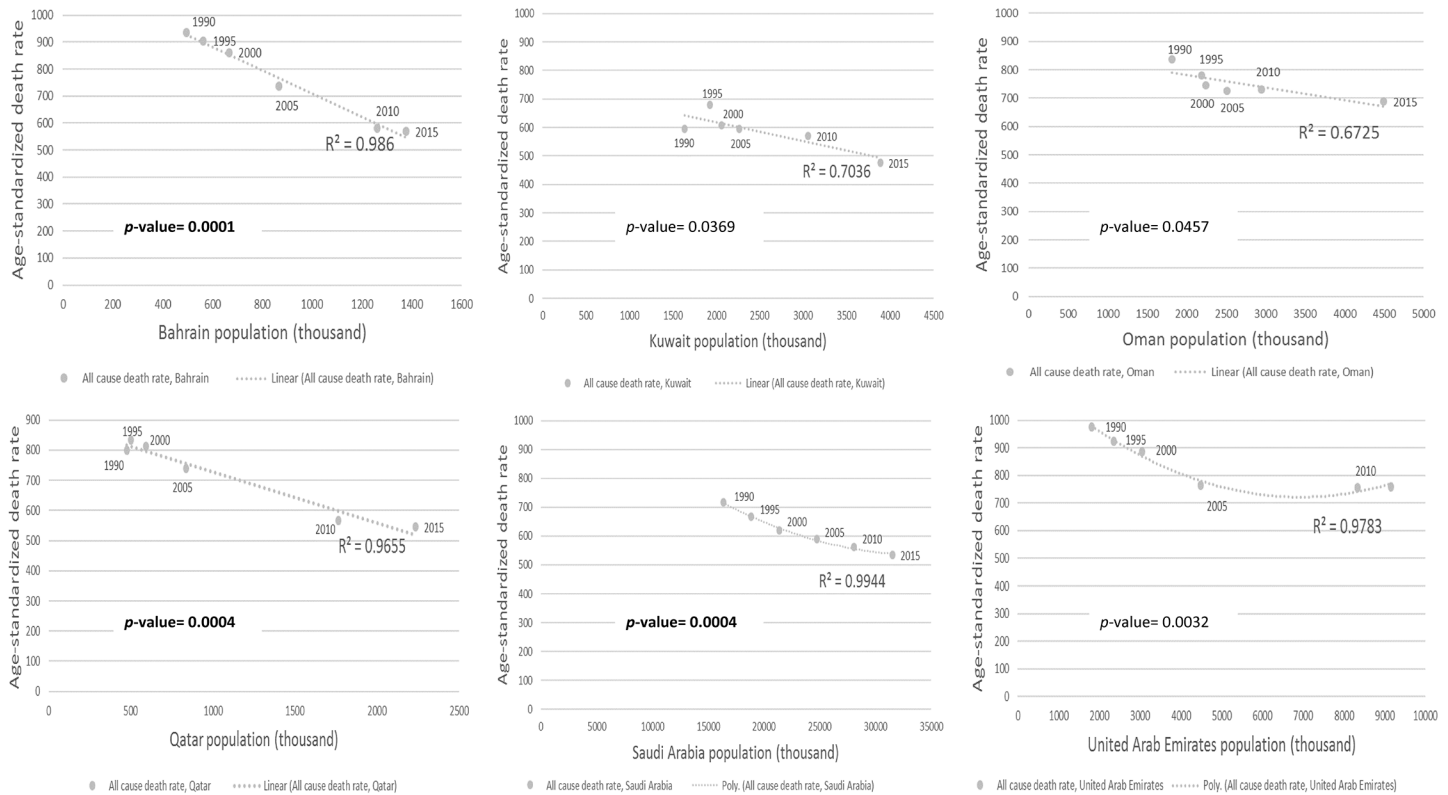

**Fig 1. Association between all-cause age-standardized mortality and population trends in the countries of Gulf Cooperation Council (GBD 2015 and United Nation data).** Triangle labels: mortality year, all-cause age-specific death rates (per 100,000), dash line: regression line.

<https://doi.org/10.1371/journal.pone.0179711.g001>

Similarly, all-cause age-specific mortality was inversely proportional to age-specific population size in Qatar (Table 2 and S6 Fig). This association was statistically significant among the 5–14 and 15–49 age groups ( $p$ -value<0.001), which have the largest population size (S2 and S3 Figs). Furthermore, in all age groups, the decrease in all-cause mortality was the highest during the same 5-year period with the highest age-specific annual population growth. This systematic decline in mortality rates cannot be attributed only to improvement in healthcare since this has been observed at a gradual pace in Qatar [35]. The large increase in Qatar’s population within a short span after 2000 could partly explain the decline in mortality rates owing to a substantial increase in the denominator, while the numerator remained minimally affected. In each age group, the increase in population is observed predominantly due to the influx of young and/or healthy individuals. Hence, one of the major drivers of decreased mortality rates appears to be migration. Consequently, decline in mortality observed in Qatar’s population consisting of nationals, short-term and long-term residents should not be considered as a positive indicator of Qatar’s population health status.

In Qatar, cause-specific age-standardized mortality rates were also inversely proportional to population size (Fig 2 and S7 Fig). This association was statistically significant for half of the GBD 2015-defined causes of death such as “cirrhosis and other chronic liver diseases” (B4,  $p$ -value<0.001,  $R^2 = 0.97$ ) and “HIV/AIDS and tuberculosis” (A1,  $p$ -value<0.01,  $R^2 = 0.94$ ). Interestingly, incoming migrants to Qatar have to be negative for HIV, hepatitis B and C, and tuberculosis [30, 31], which could further explain the decrease in cause-specific mortality for “HIV/AIDS and tuberculosis” (A1) and “cirrhosis and other chronic liver diseases” (B4).

**Table 1. Annual percent change of all-cause mortality in the GCC countries and their annual population growth between 1995 and 2015.**

| Country              | Year | All-cause death rate (per 100,000) | Annual percent change (%) | Population (thousand) | Annual population growth (%) |
|----------------------|------|------------------------------------|---------------------------|-----------------------|------------------------------|
| Bahrain              | 1990 | 935.1                              |                           | 496                   |                              |
|                      | 1995 | 904.9                              | -0.6                      | 564                   | 2.7                          |
|                      | 2000 | 861.2                              | -1.0                      | 667                   | 3.7                          |
|                      | 2005 | 737.3                              | -2.9                      | 867                   | 6.0                          |
|                      | 2010 | 580.1                              | -4.3                      | 1,261                 | 9.1                          |
|                      | 2015 | 569.1                              | -0.4                      | 1,377                 | 1.8                          |
| Kuwait               | 1990 | 594.1                              |                           | 1,637                 |                              |
|                      | 1995 | 680.3                              | 2.9                       | 1,929                 | 3.6                          |
|                      | 2000 | 607.0                              | -2.2                      | 2,059                 | 1.3                          |
|                      | 2005 | 595.2                              | -0.4                      | 2,264                 | 2.0                          |
|                      | 2010 | 570.3                              | -0.8                      | 3,059                 | 7.0                          |
|                      | 2015 | 475.8                              | -3.3                      | 3,892                 | 5.4                          |
| Oman                 | 1990 | 836.9                              |                           | 1,812                 |                              |
|                      | 1995 | 781.4                              | -1.3                      | 2,192                 | 4.2                          |
|                      | 2000 | 745.8                              | -0.9                      | 2,239                 | 0.4                          |
|                      | 2005 | 725.7                              | -0.5                      | 2,507                 | 2.4                          |
|                      | 2010 | 731.2                              | 0.2                       | 2,944                 | 3.5                          |
|                      | 2015 | 687.8                              | -1.2                      | 4,491                 | 10.5                         |
| Qatar                | 1990 | 800.6                              |                           | 476                   |                              |
|                      | 1995 | 832.7                              | 0.8                       | 501                   | 1.0                          |
|                      | 2000 | 812.5                              | -0.5                      | 593                   | 3.7                          |
|                      | 2005 | 739.5                              | -1.8                      | 837                   | 8.2                          |
|                      | 2010 | 566.9                              | -4.7                      | 1,766                 | 22.2                         |
|                      | 2015 | 544.7                              | -0.8                      | 2,235                 | 5.3                          |
| Saudi Arabia         | 1990 | 717.9                              |                           | 16,361                |                              |
|                      | 1995 | 666.9                              | -1.4                      | 18,854                | 3.0                          |
|                      | 2000 | 619.5                              | -1.4                      | 21,392                | 2.7                          |
|                      | 2005 | 588.8                              | -1.0                      | 24,745                | 3.1                          |
|                      | 2010 | 561.1                              | -0.9                      | 28,091                | 2.7                          |
|                      | 2015 | 535.0                              | -0.9                      | 31,540                | 2.5                          |
| United Arab Emirates | 1990 | 976.4                              |                           | 1,811                 |                              |
|                      | 1995 | 924.1                              | -1.1                      | 2,350                 | 5.9                          |
|                      | 2000 | 887.7                              | -0.8                      | 3,050                 | 6.0                          |
|                      | 2005 | 764.1                              | -2.8                      | 4,482                 | 9.4                          |
|                      | 2010 | 757.4                              | -0.2                      | 8,329                 | 17.2                         |
|                      | 2015 | 758.9                              | 0.0                       | 9,157                 | 2.0                          |

<https://doi.org/10.1371/journal.pone.0179711.t001>

Therefore, cause-specific mortality rates appear to be influenced by the health profile of incoming migrants to Qatar.

In their methodology, GBD 2015 used three updated death distribution methods to estimate completeness of death registration [19, 20]. These demographic methods were also used to estimate the fraction of deaths counted by registration systems [36]. Correction factors for observed deaths are produced by these methods to estimate mortality levels [36]. Remarkably, these three methods should be applicable only if there is no migration observed in the studied population [36]. We can argue that these death distribution methods cannot be applied to the GCC countries, since the major contributor of population growth is migrant labor [1, 2].

**Table 2. Simple linear and polynomial regression statistics assessing the association between all-cause age-specific mortality trends and age-specific population size trends, Qatar, both genders.**

| Age group     | Year | All-cause death rate (per 100,000) | Annual percent change (%) | Population (thousand) | Population growth (%) | R-squared          | p-value             |
|---------------|------|------------------------------------|---------------------------|-----------------------|-----------------------|--------------------|---------------------|
| Under 5 years | 1990 | 446                                | -                         | 52                    |                       | 0.837 <sup>a</sup> | 0.0105              |
|               | 1995 | 397                                | -2.2                      | 49                    | -1.2                  |                    |                     |
|               | 2000 | 344                                | -2.7                      | 56                    | 2.9                   |                    |                     |
|               | 2005 | 293                                | -2.9                      | 72                    | 5.8                   |                    |                     |
|               | 2010 | 256                                | -2.5                      | 89                    | 4.9                   |                    |                     |
|               | 2015 | 188                                | -5.4                      | 132                   | 9.7                   |                    |                     |
| 5–14 years    | 1990 | 40                                 | -                         | 83                    |                       | 0.988 <sup>b</sup> | 0.0013 <sup>c</sup> |
|               | 1995 | 38                                 | -1.4                      | 84                    | 0.2                   |                    |                     |
|               | 2000 | 33                                 | -2.4                      | 98                    | 3.4                   |                    |                     |
|               | 2005 | 27                                 | -3.4                      | 125                   | 5.4                   |                    |                     |
|               | 2010 | 23                                 | -3.6                      | 149                   | 3.9                   |                    |                     |
|               | 2015 | 18                                 | -4.2                      | 215                   | 8.8                   |                    |                     |
| 15–49 years   | 1990 | 159                                | -                         | 306                   |                       | 0.953 <sup>a</sup> | 0.0008 <sup>c</sup> |
|               | 1995 | 168                                | 1.2                       | 330                   | 1.6                   |                    |                     |
|               | 2000 | 168                                | -0.1                      | 384                   | 3.3                   |                    |                     |
|               | 2005 | 138                                | -3.6                      | 552                   | 8.7                   |                    |                     |
|               | 2010 | 98                                 | -5.8                      | 1382                  | 30.0                  |                    |                     |
|               | 2015 | 87                                 | -2.2                      | 1705                  | 4.7                   |                    |                     |
| 50–69 years   | 1990 | 849                                | -                         | 32                    |                       | 0.914 <sup>a</sup> | 0.0029              |
|               | 1995 | 918                                | 1.6                       | 34                    | 1.5                   |                    |                     |
|               | 2000 | 909                                | -0.2                      | 50                    | 9.2                   |                    |                     |
|               | 2005 | 741                                | -3.7                      | 82                    | 13.0                  |                    |                     |
|               | 2010 | 498                                | -6.6                      | 134                   | 12.6                  |                    |                     |
|               | 2015 | 515                                | 0.7                       | 167                   | 4.9                   |                    |                     |
| 70+ years     | 1990 | 7,054                              |                           | 3                     |                       | 0.892 <sup>a</sup> | 0.0045              |
|               | 1995 | 7,164                              | 0.3                       | 4                     | 3.9                   |                    |                     |
|               | 2000 | 6,666                              | -1.4                      | 5                     | 6.3                   |                    |                     |
|               | 2005 | 6,111                              | -1.7                      | 6                     | 2.4                   |                    |                     |
|               | 2010 | 3,988                              | -6.9                      | 12                    | 19.6                  |                    |                     |
|               | 2015 | 4,080                              | 0.5                       | 17                    | 8.1                   |                    |                     |

a: simple linear regression  
 b: polynomial regression order 2  
 c: statistically significant (F-test)

<https://doi.org/10.1371/journal.pone.0179711.t002>

Hence, mortality rates for the GCC countries estimated by GBD 2015 should be interpreted with caution [36]. In addition, as years of life lost and disability-adjusted life year are estimated from mortality, these metrics used to quantify the burden of disease within the GCC countries should also be interpreted with caution.

In our study, we used publically available GBD 2015 and UN data, to assess the association between mortality and population trends in the GCC countries. The strength of our study is that we emphasize demographic specificities in the GCC countries that should be taken into consideration when interpreting mortality rates in these countries. This has relevance and significance for developing and monitoring population health programs. Policy makers may use the mortality rates as available in the GBD data without distinguishing between nationals,

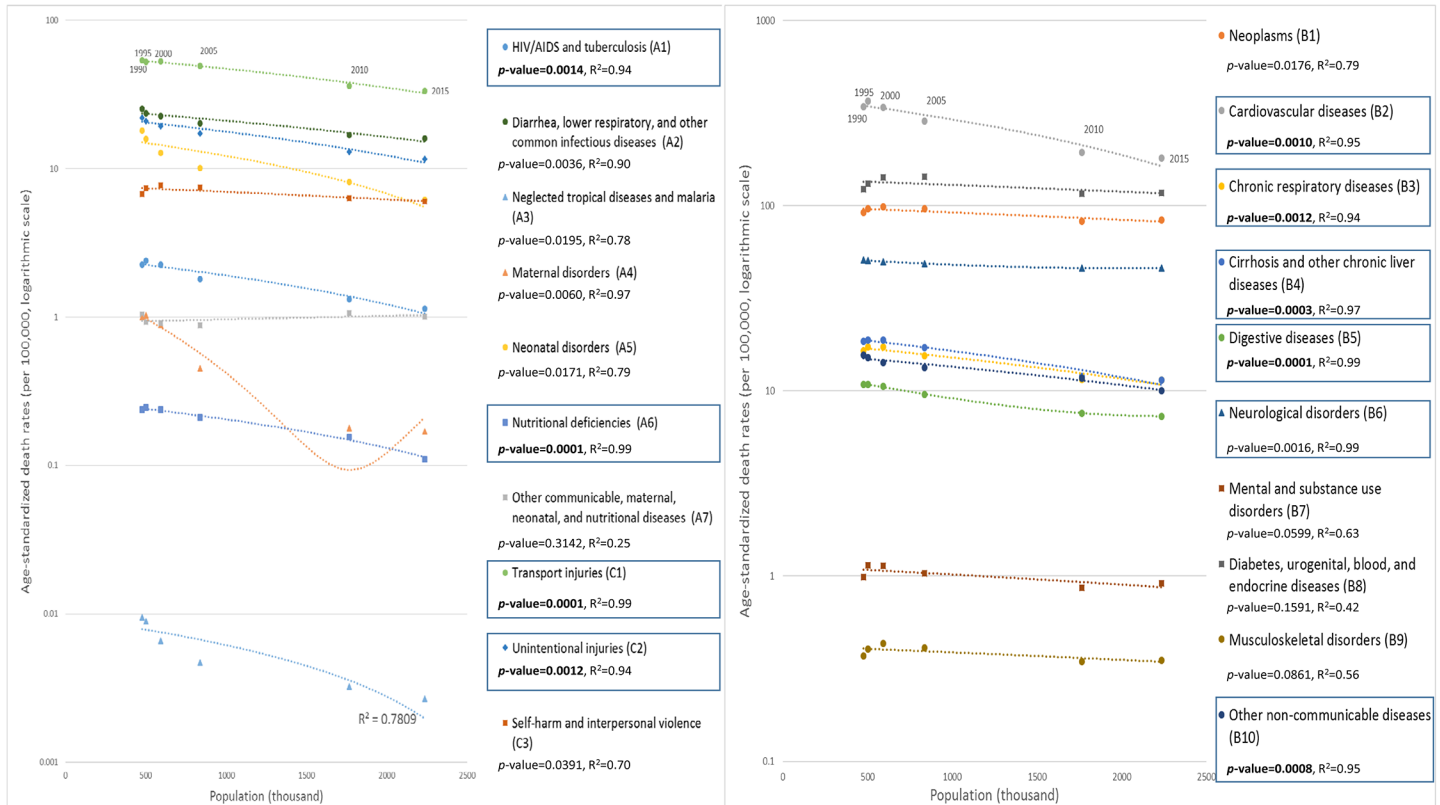

**Fig 2. Cause-specific age-standardized mortality against population size in Qatar, both genders (GBD 2015 and United Nation data).** Dash line: regression line.

<https://doi.org/10.1371/journal.pone.0179711.g002>

long-term residents and migrants. Our analysis was limited as GBD 2015 and UN data do not provide data by sub-populations (migrants *versus* Qataris and long-term residents). As such, we were not able to compare mortality in the total population with mortality in the subpopulations to further demonstrate our hypothesis of healthy migrant effect.

In conclusion, our findings show that the increase in GCC countries' population over the last two decades have decreased mortality rates. This increase in population is due to an influx of large number of migrants, which constitute a substantial proportion of GCC countries' population. Mortality trends might have been varied if the current migration strategy in the GCC countries were different. In general, researchers and policymakers in the GCC countries should be cautious so as not to exclusively attribute this decline in mortality rates as a result of the positive effect of health-based interventions or improvement in the healthcare system. Furthermore, mortality decline observed in the total population (nationals and short-term and long-term residents) of the GCC countries should not be considered as a positive indicator for population health status. In order, to elucidate changes in mortality trends as a result of health-based interventions and improvement in the healthcare system, stratification—nationals and long-term residents ( $\geq 15$  years) *versus* short-term residents ( $< 15$  years), should be considered [37].

## Supporting information

**S1 Fig. Population size time trends in the countries of Gulf Cooperation Council among males by age group (United Nation data).**

(TIF)

**S2 Fig. Population size time trends in the countries of Gulf Cooperation Council among females by age group (United Nation data).**

(TIF)

**S3 Fig. Steady decline in all-cause age-specific mortality rates among children and in cause-specific age-standardized mortality rates for neonatal disorders, in the countries of the Gulf Cooperation Council, males and females (GBD 2015 data).**

(TIF)

**S4 Fig. Diagnostic plots—fitted values versus residuals, of the linear and polynomial regression assessing the association between all-cause mortality and population trends in the countries of Gulf Cooperation Council.**

(TIF)

**S5 Fig. Plots of population size versus all-cause age-standardized mortality in Andorra, Brunei, Israel, Luxembourg, Singapore, and Switzerland (GBD 2015 and United Nation data).**

(TIF)

**S6 Fig. Diagnostic plots—fitted values versus residuals, of the linear and polynomial regression assessing the association between all-cause age-specific mortality trends and age-specific population size trends, Qatar, both genders.**

(TIF)

**S7 Fig. Diagnostic plots—fitted values versus residuals, of the linear and polynomial regression assessing the association between cause-specific age-standardized mortality against population size, Qatar, both genders.**

(TIF)

## Author Contributions

**Conceptualization:** KC SC RM.

**Formal analysis:** KC.

**Methodology:** KC SC RM.

**Supervision:** SC RM.

**Writing – original draft:** KC.

**Writing – review & editing:** KC SC RM.

## References

1. Abdul Salam A, Elsegaey I, Khraif R, AlMutairi A, Aldosari A. Components and public health impact of population growth in the Arab world. *PLoS one*. 2015; 10(5):e0124944. <https://doi.org/10.1371/journal.pone.0124944> PMID: 25993053; PubMed Central PMCID: PMC4436256.
2. Migration Policy Institute tabulation of data from the United Nations. Trends in International Migrant Stock: Migrants by Destination and Origin (United Nations database, POP/DB/MIG/Stock/Rev.2015): Department of Economic and Social Affairs, 2015. Available from: <http://www.migrationpolicy.org/programs/data-hub/charts/top-25-destinations-international-migrants>.
3. United Nations. Total Population—Both Sexes. De facto population in a country, area or region as of 1 July of the year indicated. Figures are presented in thousands. World Population Prospects: The 2015 Revision 2016. Available from: <https://esa.un.org/unpd/wpp/Download/Standard/Population/>.



4. De Bel-Air F. Gulf Labour Markets and Migration (GLMM). Demography, migration and labour market in Saudi Arabia. GLMM—EN—No. 1/2014. San Domenico di Fiesole, Italy: European University Institute and Gulf Research Center (GRC), 2014.
5. De Bel-Air F. Gulf Labour Markets and Migration (GLMM). Demography, migration and labour market in Oman. GLMM—EN—No. 9/2015. San Domenico di Fiesole, Italy: European University Institute and Gulf Research Center (GRC), 2015.
6. De Bel-Air F. Gulf Labour Markets and Migration (GLMM). Demography, migration and labour market in Bahrain. GLMM—EN—No. 6/2015. San Domenico di Fiesole, Italy: European University Institute and Gulf Research Center (GRC), 2015.
7. De Bel-Air F. Gulf Labour Markets and Migration (GLMM). Demography, migration and labour market in Kuwait. GLMM—EN—No. 1/2013. San Domenico di Fiesole, Italy: European University Institute and Gulf Research Center (GRC), 2013.
8. De Bel-Air F. Gulf Labour Markets and Migration (GLMM). Demography, Migration, and the Labour Market in the UAE. GLMM—EN—No. 7/2015. San Domenico di Fiesole, Italy: European University Institute and Gulf Research Center (GRC), 2015.
9. Priya DSouza Consultancy. Population of Qatar by nationality—2017 report. Doha, Qatar: 2017.
10. The World Bank. Diabetes prevalence (% of population ages 20 to 79) 2016 [cited 2017 January, 11 2017]. Available from: <http://data.worldbank.org/indicator/SH.STA.DIAB.ZS>.
11. Supreme Council of Health. WHO STEPWISE Report 2012 chronic disease risk factor surveillance Doha, Qatar: 2013.
12. Ministry of Health. WHO STEPWISE Approach to chronic disease risk factor surveillance. Country-specific standard report. Kuwait. Kuwait: 2015.
13. Ministry of Health. WHO STEPWISE Approach to chronic disease risk factor surveillance. Country-specific standard report. Bahrain. Bahrain: 2007.
14. World Health Organisation. Noncommunicable Diseases (NCD) Country Profiles, 2014 Switzerland2014 [cited 2017]. Available from: [http://www.who.int/nmh/countries/are\\_en.pdf](http://www.who.int/nmh/countries/are_en.pdf).
15. Ministry of Health. WHO STEPWISE Approach to chronic disease risk factor surveillance. Country-specific standard report. Bahrain. Oman: 2006.
16. Ministry of Health. WHO STEPWISE Approach to chronic disease risk factor surveillance. Country-specific standard report. Saudi Arabia. Saudi Arabia: 2005.
17. Ogden CL, Carroll MD, Fryar CD, Flegal KM. Prevalence of Obesity Among Adults and Youth: United States, 2011–2014. NCHS Data Brief. 2015;(219):1–8. PMID: [26633046](https://pubmed.ncbi.nlm.nih.gov/26633046/).
18. World Health Organisation. Obesity and overweight fact sheet Geneva, Switzerland2016. Available from: <http://www.who.int/mediacentre/factsheets/fs311/en/>.
19. GBD 2015 Mortality and Causes of Death Collaborators. Global, regional, and national life expectancy, all-cause mortality, and cause-specific mortality for 249 causes of death, 1980–2015: a systematic analysis for the Global Burden of Disease Study 2015. Lancet. 2016; 388(10053):1459–544. [https://doi.org/10.1016/S0140-6736\(16\)31012-1](https://doi.org/10.1016/S0140-6736(16)31012-1) PMID: [27733281](https://pubmed.ncbi.nlm.nih.gov/27733281/).
20. Institute for Health Metrics and Evaluation GBD Compare | Viz Hub: University of Washington; 2017. Available from: <http://vizhub.healthdata.org/gbd-compare/>.
21. Rahman S, Salameh K, Bener A, El Ansari W. Socioeconomic associations of improved maternal, neonatal, and perinatal survival in Qatar. Int J Womens Health. 2010; 2:311–8. <https://doi.org/10.2147/IJWH.S12426> PMID: [21151678](https://pubmed.ncbi.nlm.nih.gov/21151678/); PubMed Central PMCID: [PMC2990900](https://pubmed.ncbi.nlm.nih.gov/PMC2990900/).
22. Institute of Medicine (US) Committee on Standards for Systematic Reviews of Comparative Effectiveness Research. Call for collaborator Washington, USA2017 [updated 2017; cited 2017]. Available from: <http://www.healthdata.org/gbd/call-for-collaborators>.
23. The R Project for Statistical Computing. R-3.3.1 for Windows (32/64 bit): The R Foundation.; 2016 [cited 2016 30/08/2016]. Available from: <https://cran.r-project.org/bin/windows/base/>.
24. Page A, Begg S, Taylor R, Lopez AD. Global comparative assessments of life expectancy: the impact of migration with reference to Australia. Bull World Health Organ. 2007; 85(6):474–81. PMID: [17639245](https://pubmed.ncbi.nlm.nih.gov/17639245/); PubMed Central PMCID: [PMC2636351](https://pubmed.ncbi.nlm.nih.gov/PMC2636351/). <https://doi.org/10.2471/BLT.06.036202>
25. Okamoto E. Mortality in East Asian countries in the pre-war period: a quasi-experimental study on healthy immigrant effects. Asia Pac J Public Health. 2008; 20 Suppl:208–14. PMID: [19533883](https://pubmed.ncbi.nlm.nih.gov/19533883/).
26. Dornnich A, Panatto D, Gasparini R, Aicizia D. The “healthy immigrant” effect: does it exist in Europe today? Italian Journal of Public Health. 2012; 9(3):e7532-1-7. Epub e7532-1.
27. Uitenbroek DG, Verhoeff AP. Life expectancy and mortality differences between migrant groups living in Amsterdam, The Netherlands. Soc Sci Med. 2002; 54(9):1379–88. PMID: [12058854](https://pubmed.ncbi.nlm.nih.gov/12058854/).

28. Kuwait Visa. Visa types 2017 [cited 2017 May 21, 2017]. Available from: <http://kuwaitvisa.com/visa-types/>.
29. Labour Market Regulatory Authority. Pre-employment Examination General Rules for Expatriates Kingdom of Bahrain N.D. [cited 2017 January, 11 2017]. Available from: [http://www.ilo.org/wcmsp5/groups/public/-/ed\\_protect/-/protrav/-/ilo\\_aids/documents/legaldocument/wcms\\_241688.pdf](http://www.ilo.org/wcmsp5/groups/public/-/ed_protect/-/protrav/-/ilo_aids/documents/legaldocument/wcms_241688.pdf).
30. Ministry of Public Health. Medical commission Doha, Qatar 2017 [cited 2017 January, 11 2017]. Available from: <https://www.moph.gov.qa/health-services/services-to-public/medical-commission/medical-commission>.
31. Health Authority. Residence-Visa Medical Check-up Abu Dhabi, United Arab Emirates 2017 [cited 2017 January, 11 2017]. Available from: <https://www.haad.ae/haad/tabid/1200/Default.aspx>.
32. Royal Oman Police—Directorate General of Operations. Employment Visa 2017 [cited 2017 May 21, 2017]. Available from: [http://www.rop.gov.om/old/english/dg\\_pr\\_visas\\_employment.asp](http://www.rop.gov.om/old/english/dg_pr_visas_employment.asp).
33. Embassy of the Kingdom of Saudi Arabia in United Kingdom. Requirement for work visa 2017 [cited 2017 May 21, 2017]. Available from: <http://embassies.mofa.gov.sa/sites/uk/EN/DiplomaticMissionServices/Consulates/ConsulatesServices/Other%20Visas%20Services%20e/Pages/REQUIREMENTS%20FOR%20Work12%20VISAS.aspx>.
34. Mamtani R, Lowenfels AB, Cheema S, Sheikh J. Impact of migrant workers on the Human Development Index. *Perspect Public Health*. 2014; 134(1):22–4. <https://doi.org/10.1177/1757913913491350> PMID: 23740620.
35. Goodman A. The development of the Qatar Healthcare System: A review of the literature. *International Journal of Clinical Medicine*. 2015; 6:177–85. <http://dx.doi.org/10.4236/ijcm.2015.63023>.
36. Murray CJ, Rajaratnam JK, Marcus J, Laakso T, Lopez AD. What can we conclude from death registration? Improved methods for evaluating completeness. *PLoS Med*. 2010; 7(4):e1000262. <https://doi.org/10.1371/journal.pmed.1000262> PMID: 20405002; PubMed Central PMCID: PMC2854130.
37. Al Kuwari H, Al Thani A, Al Marri A, Al Kaabi A, Abderrahim H, Affi N, et al. The Qatar Biobank: background and methods. *BMC Public Health*. 2015; 15:1208. <https://doi.org/10.1186/s12889-015-2522-7> PMID: 26635005; PubMed Central PMCID: PMC4669623.
